# Behavioral benefits of spatial attention explained by multiplicative gain, not receptive field shifts, in a neural network model

Kai J. Fox<sup>\*1,3</sup>, Daniel Birman<sup>\*2,3</sup>, and Justin L. Gardner<sup>1</sup>

<sup>1</sup>Department of Psychology, Stanford University, Stanford, CA 94305, USA

<sup>2</sup>Department of Biological Structure, University of Washington, Seattle, WA 98195, USA

<sup>3</sup>Correspondence to: [kaifox@stanford.edu](mailto:kaifox@stanford.edu) or [dbirman@uw.edu](mailto:dbirman@uw.edu)

\*Authors contributed equally to this work

March 4, 2022

## Abstract

Attention allows us to focus sensory processing on behaviorally relevant aspects of the visual world. Directing attention has been associated with a number of changes in sensory representation including multiplicative gain as well as shifts in the size and location of neuron receptive fields in early visual cortex. But, which, if any, of these physiological effects can account for the behavioral benefits of attention? Here we use a large scale computational model of primate visual cortex to perform a set of experiments in which we decouple changes in spatial tuning from changes in gain. We show that increased gain at cued locations in a neural network observer model mimics the improvement of human subjects on an attentional task with a spatial cue. Increasing gain resulted in changes in receptive field size and location similar to physiological effects, yet when we forced the model to use only these spatial tuning changes the model failed to produce any behavioral benefit. Instead, we found that gain alone was both necessary and sufficient to explain behavioral improvement during attention. Our results suggest that receptive field shifts are a result of the signal gain that boosts behavioral performance rather than the core mechanism of spatial attention.

## 1 Introduction

2 Deploying goal-directed spatial attention towards important visual locations allows observers to detect targets  
3 with higher accuracy (Hawkins et al., 1990), faster reaction times (Posner, 1980), and higher sensitivity (Sagi &  
4 Julesz, 1986) providing humans and non-human primates with a mechanism to select and prioritize spatial visual  
5 information (Carrasco, 2011). At the same time as behavioral responses are enhanced, sensory responses near  
6 attended locations are amplified (Connor et al., 1996; McAdams & Maunsell, 1999) and the receptive fields of  
7 neural populations change shape and size, typically shrinking and shifting towards the target of attention (Anton-  
8 Erxleben et al., 2009; Ben Hamed et al., 2002; Kay et al., 2015; Klein et al., 2014; van Es et al., 2018; Vo et al.,  
9 2017; Womelsdorf et al., 2006). These changes in neural representation are thought to contribute to behavioral  
10 enhancement, but because gain effects and changes in spatial properties of receptive fields co-occur in biological  
11 systems, it is not possible to disentangle which of these changes gives rise to improved behavior. Computational  
12 models of the visual system allow us to design experiments to independently examine the effects of such changes  
13 (Eckstein et al., 2000; Lindsay & Miller, 2018; Pelli, 1985).

14 Shrinkage and shift of receptive fields toward attended targets has been observed in single unit recordings (Anton-  
15 Erxleben et al., 2009; Womelsdorf et al., 2006) and in population activity measured with functional imaging  
16 (Fischer & Whitney, 2009; Klein et al., 2014; van Es et al., 2018; Vo et al., 2017). These physiological changes  
17 could cause behavioral enhancement through a variety of possible mechanisms (Anton-Erxleben & Carrasco, 2013):  
18 receptive field changes might magnify the cortical representation of attended regions (Moran & Desimone, 1985),  
19 select for relevant information (Anton-Erxleben et al., 2009; Sprague & Serences, 2013), reduce uncertainty about  
20 spatial position (Vo et al., 2017), increase spatial discriminability (Fischer & Whitney, 2009; Kay et al., 2015), or  
21 change estimates of perceptual size (Anton-Erxleben et al., 2007). Compression of visual space is also observed  
22 just prior to saccades and thought to shift receptive fields towards the saccade location (C. L. Colby & Goldberg,  
23 1999; Merriam et al., 2007; Zirnsak et al., 2014) and maintain a stable representation of visual space (C. Colby,  
24 Goldberg, et al., 1992; Kusunoki & Goldberg, 2003; Ross et al., 1997; Tolias et al., 2001). It is also possible that  
25 shift and shrinkage of receptive fields occur as a side effect of amplifying neural responses in an asymmetrical  
26 way across a receptive field (Klein et al., 2014), raising the question of how these two effects combine to enhance  
27 perception.

28 We took a modeling approach to address whether receptive field shift and shrinkage are responsible for the  
29 behavioral enhancement of spatial attention or a side-effect of neural gain. We modified a convolutional neural  
30 network (CNN) to test various hypotheses by implementing them as elements of the model architecture. CNN  
31 architectures can be designed to closely mimic the primate visual hierarchy (Kubilius et al., 2018; Yamins et

32 al., 2014). Training “units” in these networks to categorize images leads to visual filters that show a striking  
33 qualitative resemblance to the filters observed in early visual cortex (Krizhevsky et al., 2012) and the pattern of  
34 activity of these units when presented with natural images is sufficient to capture a large portion of the variance  
35 in neural activity in the retina (McIntosh et al., 2016), in early visual cortex (Cadena et al., 2019), and in later  
36 areas (Cichy et al., 2016; Eickenberg et al., 2017; Güçlü & van Gerven, 2015; Khaligh-Razavi & Kriegeskorte,  
37 2014; Yamins et al., 2014). Cortical responses and neural network activity also share a correlation structure across  
38 natural image categories (Storrs et al., 2020). These properties of CNNs make them a useful tool which we can  
39 use to indirectly study visual cortex, probing activity and behavior in ways that are impractical in humans and  
40 non-human primates (Lindsay & Miller, 2018).

41 Using simulations based on a CNN observer model we found that the benefits of spatial attention are explained  
42 by multiplicative gain alone. We designed a simple cued object-detection task and measured improved human  
43 performance on trials with focal attention. Using a CNN whose architecture was designed to maximize similarity  
44 with the primate visual stream we measured a similar improvement in detection performance when a Gaussian  
45 gain augmented inputs coming from a “cued” location. We found that the network mirrored the physiology of  
46 human and non-human primates: units shifted their center-of-mass toward the locus of attention and shrank in  
47 size, all in a gain-dependent manner. We isolated each of these physiological changes to determine which, if any,  
48 could account for the behavioral effects. A model with only gain reproduced the behavioral benefits of attention  
49 while models with only receptive field shifts or only changes in receptive field sensitivity were unable to provide  
50 any behavioral benefit. We conclude that gain changes alone are both necessary and sufficient to account for the  
51 behavioral benefits of spatial attention.

## 52 Results

53 We characterized the ability of human observers to detect objects in a grid of four images, with or without prior  
54 information about the object’s possible location (Fig. 1). Observers were given a written category label, e.g.  
55 “ferris wheel”, and shown five exemplar images of that category (Category intro, 1a). This was followed by a  
56 block of 80 trials in which observers tried to detect the presence or absence of the target category among the four  
57 images in the grid (Each trial, 1a). Half of the 80 trials had focal cues and 50% of the focal (and distributed)  
58 trials included a target image. On focal trials a cue indicated with 100% validity the grid quadrant that could  
59 contain a target while on distributed trials no information was given as to where an image of the target category  
60 could appear. Distractor images were randomly sampled from the nineteen non-target image categories. Stimulus

61 durations were sampled uniformly from 1 (0.008 s), 2 (0.016), 4 (0.033), 8 (0.066), 16 (0.133), or 32 (0.267)  
62 frames (Stimulus, 8.33 ms per frame, 1a). Image grids were masked before and after stimulus presentation  
63 by shuffling the pixel locations in the stimulus images, ensuring that the luminance during each trial remained  
64 constant. Observers had 2 s to make a response and each trial was followed by a 0.25 s inter-trial interval.  
65 Observers completed one training block on an unused category prior to data collection.

66 Human observers improved their performance on this detection task when given a focal cue indicating the potential  
67 location of a target (Fig. 1b). At a stimulus duration of 8 ms (one frame) observers were near chance performance  
68 regardless of cueing condition. On distributed trials observers exceeded threshold performance ( $d' = 1$ ) at a  
69 stimulus duration of 155 ms, 95% CI [135, 197]. For focal trials, the same threshold was reached with only a 38  
70 ms [32, 43] stimulus duration, demonstrating a substantial performance benefit of focal cueing. We characterized  
71 this performance benefit by fitting a logarithmic function to the data, scaled by a parameter  $\alpha$  for the focal  
72 condition. We found that  $d'$  in the focal condition was higher than in the distributed condition, average increase  
73 across observers  $\alpha = 1.67 \times [1.57, 1.74]$ . Across all observers the  $d'$  function was best fit as:

$$d'(ms) = \alpha \log(163.588ms + 1) \quad (1)$$

74 Using a drift diffusion model we found that the majority of this performance benefit came from the focal cue,  
75 rather than speed-accuracy trade off. We assessed this by fitting a drift diffusion model to the reaction time and  
76 choice data (Wagenmakers et al., 2007). Drift diffusion models assume that responses are generated by a diffusion  
77 process in which evidence accumulates over time toward a bound. We used the equations in Wagenmakers et  
78 al. (2007) to transform each observer's percent correct, mean reaction time, and reaction time variance for the  
79 twenty categories and two focal conditions into drift rate, bound separation, and non-decision time. The drift rate  
80 parameter is designed to isolate the effect of external input, the non-decision time reflects the fastest responses an  
81 observer makes, and the bound separation is a proxy for how conservative observers are. Comparing the drift rate  
82 parameter we observed a similar effect to what was described above for  $d'$ : the average drift rate across observers  
83 in the focal condition was  $1.61 \times$ , 95% CI [1.39, 1.77] the drift rate in the distributed condition. This suggests  
84 that the majority of the performance gain observed in the  $d'$  parameter came from increased stimulus information.  
85 We did find that the other parameters of the drift diffusion model were also sensitive to duration and condition,  
86 but in opposite directions. We found larger bound separation at longer stimulus durations and on focal trials  
87 (focal bound-separation  $1.57 \times$  distributed [1.37, 1.75]), consistent with observers being more conservative on  
88 trials where more information was available. But this increase in cautiousness was offset by a shorter non-decision  
89 time on focal trials (0.26 s) compared to distributed (0.38, [0.34, 0.41]).

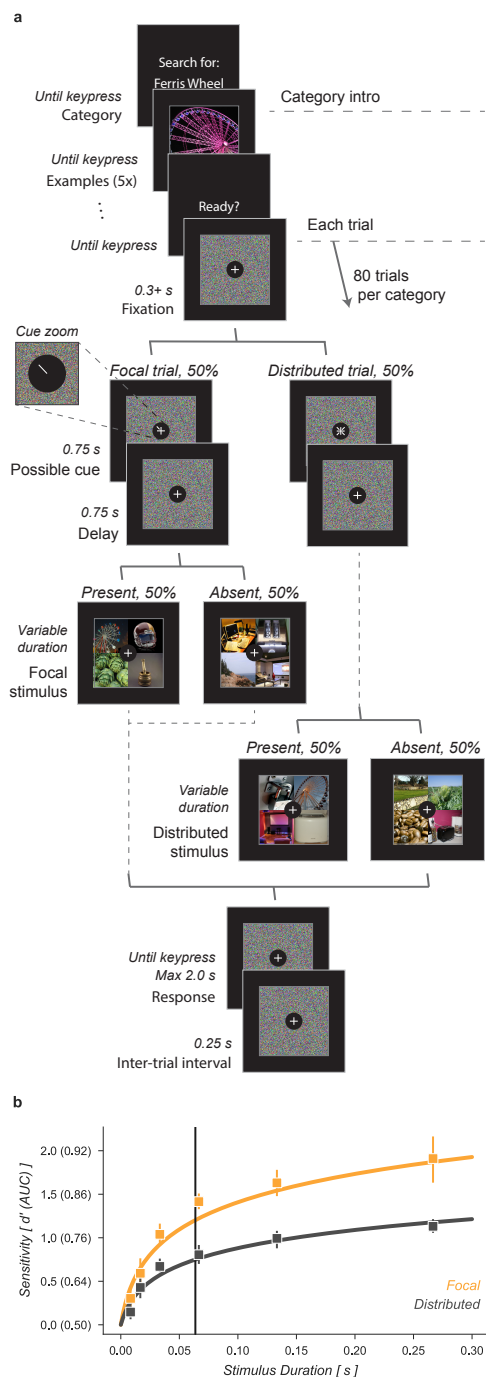

Figure 1: Cued object detection task. (a) Observers were asked to perform object detection with or without a spatial cue. At the start of a block, observers were shown five examples of the target category. This was followed by 80 trials: 40 with a spatial cue indicating the possible target quadrant and 40 with no prior information. Stimulus presentation was pre and post-masked. The stimuli consisted of a composite image of four individual object exemplars. The target category was present in 50% of trials and always in the cued location on focal trials. Human observers used a keyboard to make a fast button response to indicate the target presence before moving on to the next trial. (b) Human observers showed a substantial improvement in performance when given a focal cue indicating the quadrant at which the target might appear. Vertical line at 64 ms indicates the duration at which the best-fit  $d'$  curve for the Distributed condition matched CNN model performance without gain. Markers indicate the median and error bars the 95% confidence intervals.

90 Having shown that a spatial cue provides human observers with increased stimulus information in this task, we  
91 next sought to show that a neural network model of the human visual stream could replicate this behavior under  
92 similar conditions. We used a convolutional neural network (CNN) model, CORnet-z (Kubilius et al., 2018), a  
93 neural network designed to mimic primate V1, V2, V4, and IT and optimized to perform object recognition for  
94 images at a similar scale to our task. We added to this model a set of output layers to predict the presence of  
95 the twenty object categories, thus creating a neural network observer model, i.e. a model designed to idealize  
96 the computations performed by human observers performing the 4-quadrant object detection task. We applied  
97 the observer model to a task analogous to the one human observers performed (Fig. 2). The prediction layers  
98 added to the end of the model provided independent readouts for the presence or absence of the different target  
99 categories (Linear classifier, Fig. 2c). These output layers were trained on a held out set of full-size images from  
100 each category.

101 To examine the computational mechanisms that could underlie the performance benefit of the focal cue we added  
102 a multiplicative Gaussian gain centered at the location of the cued image (Fig. 2b). We applied this gain at  
103 the first layer of the model, analogous to a gain signal modulating responses in primate V1, and tested various  
104 strengths of gain.

105 To align the human and model performance for this task we took the performance of the model in the distributed  
106 condition (Distributed, Fig. 2a) and found the stimulus duration at which subjects in the distributed condition  
107 of the human data matched this performance level (64 ms, Fig. 1b). We then scaled up the amplitude of the  
108 Gaussian gain incrementally and found that we could mimic the performance enhancement of attending from the  
109 human data by setting the maximum of the Gaussian gain field to approximately  $4\times$ . The model with this level  
110 of gain had a median AUC across categories of 0.80, 95% CI [0.77, 0.82] compared to 0.71 [0.67, 0.72] without  
111 gain and a median AUC improvement of 0.09 [0.08, 0.12] within each category.

112 The gain strengths necessary to induce the behavioral effect in the neural network observer model were relatively  
113 large compared to the gain due to directed attention observed in measurements of single unit (Luck et al., 1997;  
114 Treue & Trujillo, 1999) and population (Birman & Gardner, 2019) activity. We attribute this difference to the  
115 lack of any non-linear “winner-take-all” type of activation in the CNN. In the primate visual system, it is thought  
116 that non-linearities such as exponentiation and normalization can accentuate response differences (Carandini &  
117 Heeger, 2012) and act as a selection mechanism for sensory signals (Pestilli et al., 2011). We tested whether  
118 similar non-linear mechanisms would allow for smaller gain strengths to be amplified to the range needed by  
119 our model by raising the activations of units by an exponent before re-normalizing the activation of all units at  
120 the output of each layer (see Methods for details). This has the effect of amplifying active units and further

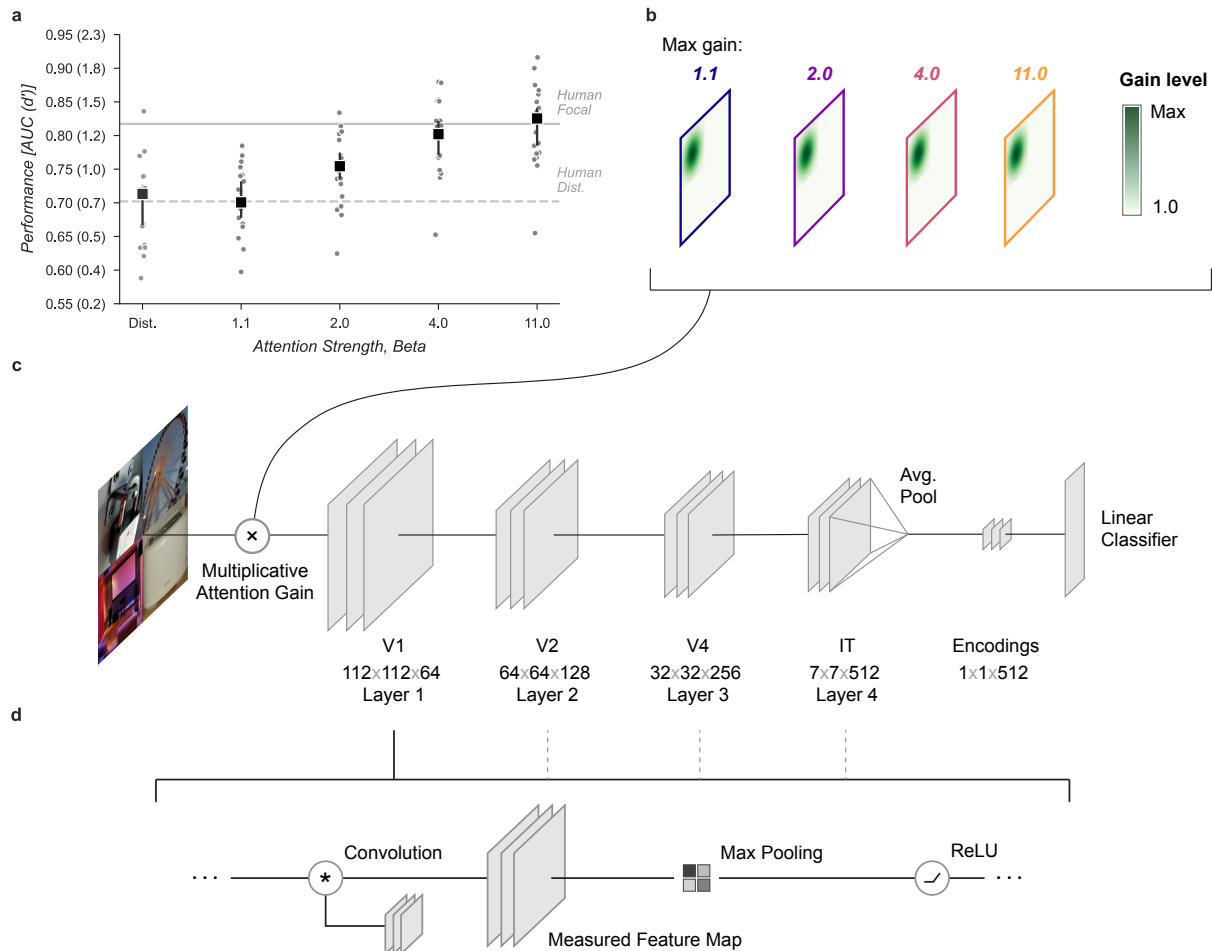

Figure 2: Neural network observer model. (a) Using a Gaussian gain the neural network observer was able to replicate the behavioral benefit of spatial attention for human observers. Human performance is shown at a stimulus duration of 64 s which provided the closest match to the convolutional neural network (CNN) performance without gain. Markers indicate the median and error bars the 95% confidence intervals. (b) The Gaussian gain was implemented by varying the maximum strength of a multiplicative gain map applied to the “cued” quadrant. (c) The gain was applied prior to the first layer of the convolution neural network (CNN). The neural network observer model consisted of a four layer CNN with linear classifiers applied to the output layer. Individual classifiers were trained on examples of each object category. (d) Each of the four convolutional layers consisted of a convolution operation followed by max pooling and a rectified linear unit. Unit activations were measured after the convolution, prior to the max pooling step.

121 suppressing inactive ones. Using this approach we found that a relatively small gain of  $1.25\times$  combined with an  
122 exponent of 3.8 led to a much larger effective gain of  $2.09\times$  after just one layer (Fig. 3j). This form of non-linearity  
123 is consistent with the finding that static output non-linearities in single units range from about 2 to 4 (Albrecht &  
124 Hamilton, 1982; Gardner et al., 1999; Heeger, 1992; Sclar et al., 1990) and thus this simulation suggests a plausible  
125 physiological mechanism by which the larger gains predicted by our model could be implemented. Repeated use of  
126 exponentiation and normalization in successive layers of the visual system could produce an even larger effective  
127 gain. To avoid training a new convolutional neural network and possibly violate the close relationship between the  
128 primate visual system and the CNN we studied, we continued our analysis without introducing an exponentiation  
129 and normalization step.

130 The Gaussian gain could have its effect on the neural network observer model's performance by increasing the  
131 activation strength of units with receptive fields near the locus of attention. These changes in activation strength  
132 might directly affect behavior, or work indirectly through mechanisms such as changes in receptive field size,  
133 location, or spatial tuning. We observed all of these effects in our model (Fig. 3). To measure receptive fields  
134 we computed the derivative of each unit with respect to the input image and then fit these with a 2D Gaussian  
135 (see Methods for details). We found that the gain caused receptive fields to shift and shrink toward the locus of  
136 attention (Fig. 3a,b). The receptive field shift and shrinkage were magnified in deeper layers of the model (Fig.  
137 3d,e) consistent with physiological observations (Klein et al., 2014). The gain in activation strength propagated  
138 through the network without modification (Fig. 3f). To measure the effective gain experienced by the layer four  
139 units (Fig. 3i) we computed the ratio of the standard deviations of unit activations after the nonlinear ReLU  
140 function (Fig. 2d) with and without gain applied. The gain also produced a non-linear change in the information  
141 represented by units late in the model (Fig. 3c), reflecting a change in units' spatial tuning rather than simply a  
142 propagation of gain. We measured this by comparing the correlation of layer 4 unit activations with and without  
143 the Gaussian gain. All three observed effects: receptive field shift, shrinkage and expansion, and effective gain  
144 were directly related to the gain strength at the input layer (Fig. 3g-i). All of these changes have been proposed  
145 as mechanisms that could account for the behavioral benefits of attention. We designed models to try to isolate  
146 these effects with the goal of testing their independent contributions to behavior.

147 We next sought to test whether receptive field shifts alone could account for the behavioral benefits of the neural  
148 network observer model. To do this, we built a model variant that could shift receptive fields without introducing  
149 gain. To develop an intuition for how this could affect perceptual reports, consider a CNN with just four units  
150 in a  $2 \times 2$  grid with each unit having its receptive field centered on one image in the composite. When shown  
151 a composite grid of four images, a logistic regression using the output of these four units would receive one  
152 quarter the information it expects from being trained on full size images. Shifting the receptive fields of the



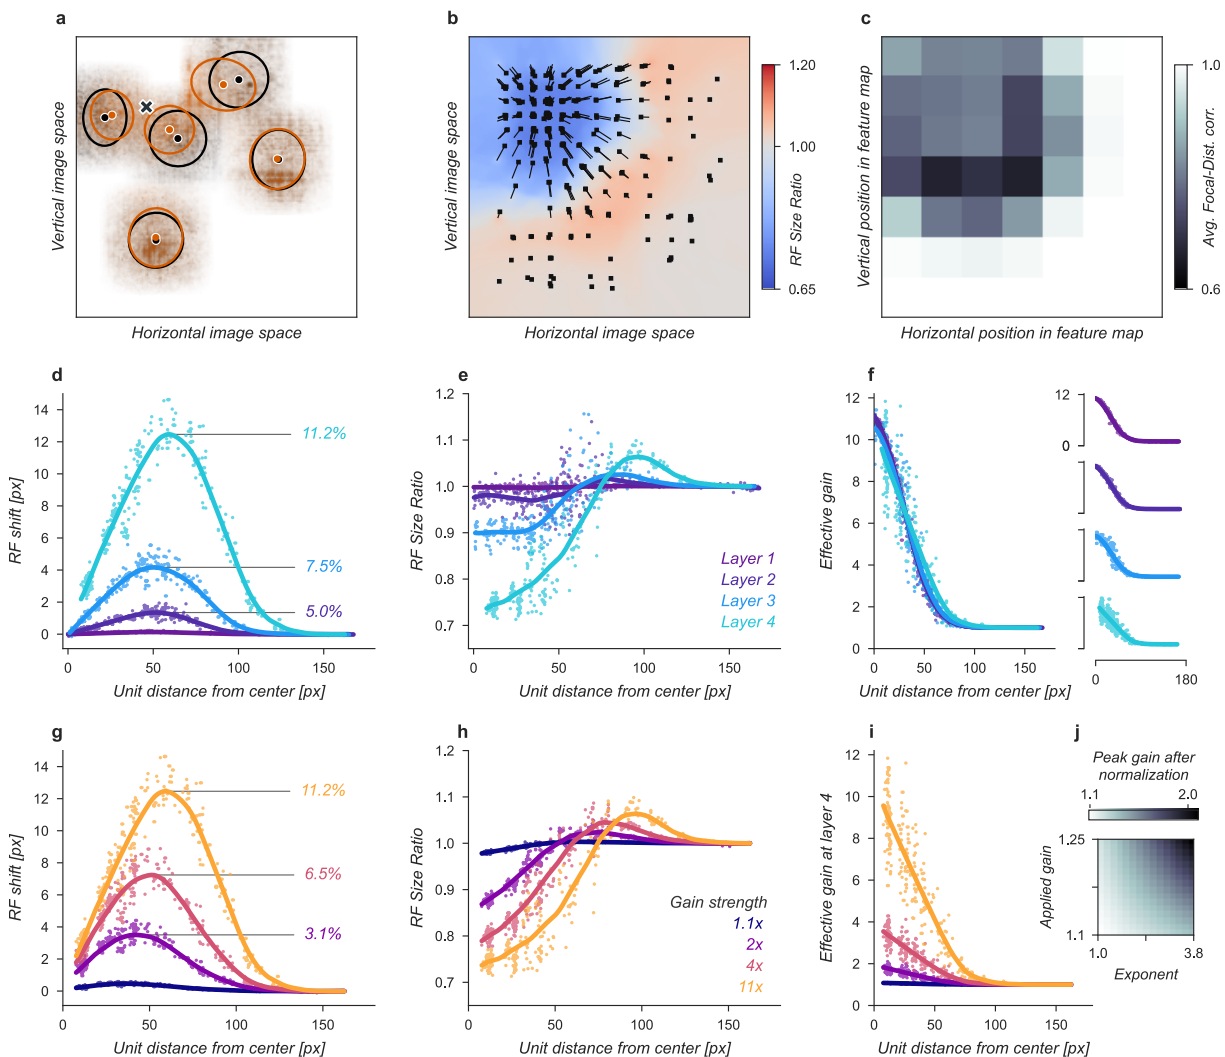

Figure 3: Effects of Gaussian gain on neural network units. (a) The Gaussian gain applied to Layer 1 units caused the measured receptive field (RF) of units in Layer 4 to shift (black ellipse, original; brown ellipse, with gain) toward the locus of attention (black  $\times$ ). (b) A 2D spatial map demonstrates the effects of Gaussian gain in Layer 4: shift of RF center position (black arrows), shrinking RF size near the attended locus (blue colors) and an expansion of size near the gain boundaries (red colors). (c) A spatial correlation map of the  $7 \times 7 \times 512$  output layer between the focal and distributed conditions demonstrates that the information content of the output layer has been affected by the Gaussian gain in ways beyond simple scaling. (d,e) Scatter plots demonstrate that each layer magnifies the effect of the gain on RF shift and RF size. The RF shift percentages are the ratio of pixel shift at the peak of the curve relative to the average receptive field size, measured as the full-width at half-maximum. (f) Later layers do not magnify the effective gain (shown for an  $11 \times$  gain), which stays constant across layers. Gain strength does influence the size of RF position shifts (g), RF size (h), and effective gain (i). (j) Adding an additional non-linear normalizing exponent at the output of each layer allows for much smaller gains to be magnified across layers.

153 three non-target units to overlap more with the cued image could add additional task-relevant information to the  
154 output.

155 We designed a variant of our model that could be used to test the hypothesis that receptive field shifts alone  
156 are responsible for the behavioral enhancement (Fig. 4). In this model we re-wired the units in the first layer  
157 to reproduce the effect of Gaussian gain on receptive fields in the fourth layer based on our measurements of  
158 receptive field shift in the Gaussian gain model, as reported in Figure 3g. To mimic those shifts, we changed  
159 the connections between the input image pixels and layer one (Fig. 4a). This manipulation worked as designed  
160 and changed the receptive field locations and size (Fig. 4b-d) but since no gain was added to the model, the  
161 overall responsiveness of units remained constant (Fig. 4e). Because receptive field shifts due to gain are not the  
162 result of actual rewiring it is unsurprising that the shift and shrinkage in this model variant are only qualitatively  
163 matched to those caused by the original Gaussian gain. Note that the effective gain in layer four *did* change, a  
164 result of the units receiving different inputs, but the average change across images was zero.

165 We found that the model with receptive field shifts but no gain had no effect on task performance, strong evidence  
166 against the hypothesis that receptive field shifts are the key to understanding the effects of spatial attention (Fig.  
167 4f). The model imitating shifts from  $4\times$  Gaussian gain had a median AUC across categories of 0.71, 95% CI  
168 [0.66, 0.73] compared to 0.71 [0.67, 0.72] with no attention and a median change in AUC of -0.01 [-0.02, 0.01]  
169 within each category.

170 Another way to understand the possible effect of the Gaussian gain on task performance is to note that the  
171 spatial tuning profile of units is “shifted” towards the locus of attention: sensitivity is enhanced closer to the locus  
172 of attention, but the receptive field itself has not truly moved in the manner studied by the previous model. If  
173 different parts of a receptive field receive asymmetrical gain, as expected for Gaussian gain, then the local structure  
174 of the receptive field has been changed (Fig. 5a). We designed another model variant to test the hypothesis that  
175 these local sensitivity shifts alone might be sufficient to explain the behavioral effect without inducing receptive  
176 field shifts or gain. To implement this model at layer  $L$ , we examined the effect of the Gaussian gain on each unit  
177 (green differential gain, Fig. 5a). We normalized this differential gain within each unit’s receptive field to prevent  
178 any overall gain effect and re-scaled the units kernel accordingly. Overall this manipulation of each unit’s kernel  
179 preserved a portion of the receptive field shift effect but guaranteed that there was no effective gain.

180 The sensitivity shift model was designed to only change the spatial tuning of individual units without inducing  
181 gain, which naturally caused some shifts in the measured receptive field size and location (solid lines and markers,  
182 Fig. 5b-d) but these were smaller than the effects observed under Gaussian gain (dashed lines). The normalization  
183 prevented the model from introducing any spatial pattern of gain change (Fig. 5e). Note that there were still

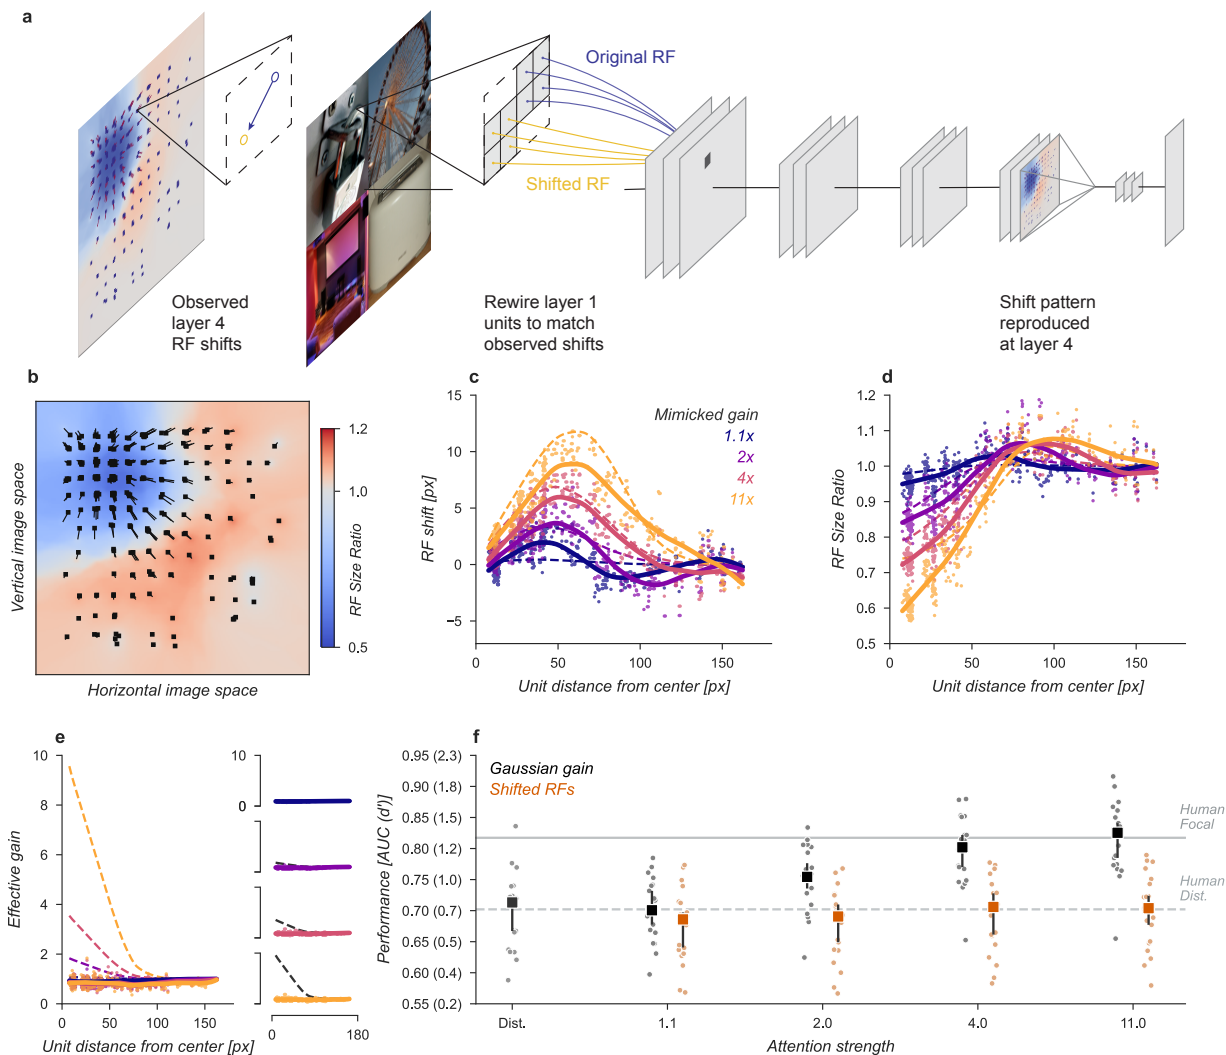

Figure 4: Receptive field shift model. (a) To mimic the effects of the Gaussian gain on receptive field position without inducing gain in the model we re-assigned the inputs to units in Layer 1. This re-assignment was performed so that the pattern of receptive field shift in Layer 4 would match what was observed when the Gaussian gain was applied. (b) The observed pattern of receptive field shifts and shrinkage is shown for a sample of units in layer 4, qualitatively matching the effects of the Gaussian gain. (c) RF shift is shown (solid lines and markers) compared to the effect in the Gaussian gain model (dotted lines). (d) Conventions as in c for the RF size change. (e) Conventions as in c,d for the effective gain of units. (f) The behavioral effect of shifting receptive fields is shown to be null on average across categories when compared to the effect of Gaussian gain. Markers indicate the median and error bars the 95% confidence intervals.

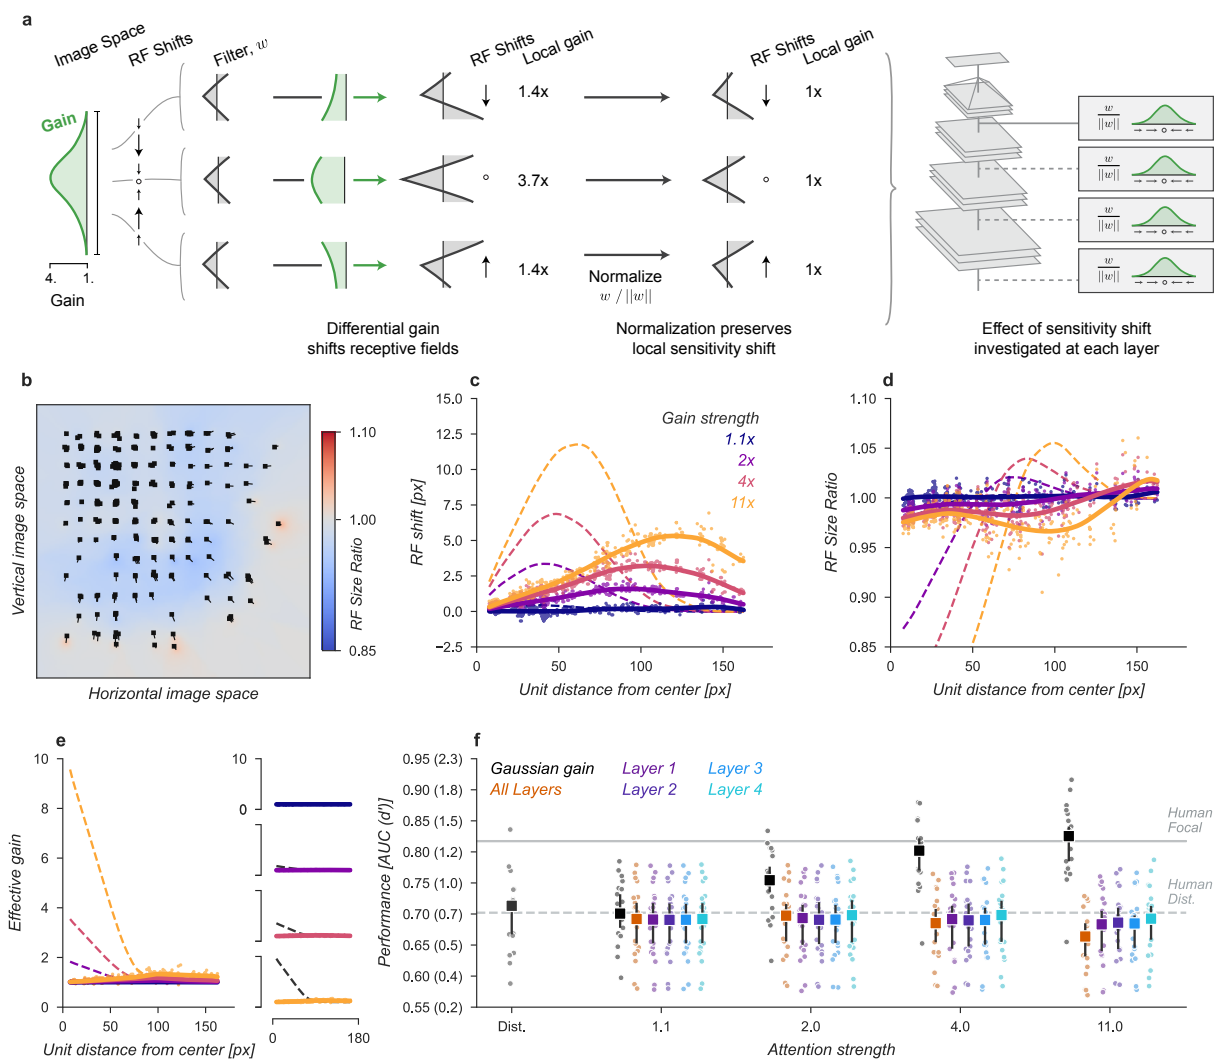

Figure 5: Sensitivity-shift model. (a) We adjusted the kernels of each convolutional neural network unit according to the effect of a Gaussian gain, subtly shifting the the sensitivity within individual units. To avoid inducing a gain change we then normalized each units output such that the sum-of-squares of the weights was held constant, ensuring the local gain at that unit remained at  $1\times$ . This model was implemented individually at each layer, replicating the effect of a Gaussian gain of  $1.1\times$  to  $11\times$  as well as at all layers at once. (b-f) conventions as in Fig. 4.

184 small changes in overall sensitivity of units in this model, for example, the  $4\times$  model had an average gain of 1.08,  
185 95% CI [1.07, 1.09] across all units, which we attribute to the fact that inputs to a unit may exhibit correlations  
186 due to spatial structure. These receptive field changes and small gain effects were distinct from those observed  
187 under Gaussian gain (Fig. 5c-e).

188 The sensitivity shift model, like the receptive field shift model, was unable to account for the behavioral effects of  
189 the Gaussian gain. No matter how deep in the model the sensitivity shift was applied, and even when applied at  
190 all layers, the average performance across categories remained flat (Fig. 5f). Compared to the median distributed  
191 AUC across categories of 0.71 [0.67, 0.72], the sensitivity model applied to all layers had a median AUC across  
192 categories of 0.69 [0.65, 0.72] when imitating gain of  $1.1\times$ , 0.70 [0.65, 0.72] for  $2\times$  gain, 0.69 [0.65, 0.71] for  
193  $4\times$  and 0.66 [0.63, 0.69] for  $11\times$ . Each of these conditions resulted in a median AUC change within category of  
194  $-0.02$  [-0.03, 0.00],  $-0.01$  [-0.03, 0.00],  $-0.02$  [-0.04, -0.01], and  $-0.04$  [-0.05, -0.03], respectively. When applied  
195 to early layers we observed a slight drop in performance, which we attribute to how this model directly alters the  
196 kernels in the CNN. This breaks the assumption that the CNN kernels at each layer are consistent with those that  
197 were optimized when the model weights were trained.

198 Having ruled out that receptive field shift or changes in spatial tuning could account for the behavioral effect, we  
199 next designed a model to amplify signals in the cued quadrant without other effects and found that this model  
200 was able to explain the behavioral effects of attention. In all of the models explored so far an asymmetry in  
201 gain was created within the receptive fields of the units. To remove this effect we flattened the gain within the  
202 cued quadrant (Fig. 6a) by setting the gain at each pixel to the average of the Gaussian gain across the entire  
203 quadrant. By itself, this change has the unintended consequence that units centered in an uncued quadrant but  
204 with receptive fields overlapping the cued quadrant will still shift in a gain-dependent manner. To remove this  
205 effect, we split the CNN feature maps into the four quadrants and computed these separately with padding and  
206 concatenated the results. This forces all units in the model to receive information about only a single quadrant.  
207 The zero padding at the borders causes receptive field shift, but these are now independent of the gain strength.

208 Using the gain-only model we were able to reproduce the behavioral effect of the original Gaussian gain (Fig. 6).  
209 By design, the model induced the same pattern of receptive field shift and size change at all gain strengths (Fig.  
210 6b-d) and a flat effective gain within the cued quadrant (Fig. 6e). We found that increasing the strength of a  
211 flat gain was sufficient to capture the full behavioral effect of the original model (Fig. 6f). The median AUC  
212 across categories of the  $4\times$  flat gain model was 0.78, 95% CI [0.76, 0.83] compared to 0.80 [0.77, 0.82] for the  
213  $4\times$  Gaussian gain model. The confidence intervals in flat gain and Gaussian gain performance overlapped at all  
214 gain strengths, with a difference of 0.00 [-0.00, 0.02] at  $1.1\times$  gain,  $-0.01$  [-0.02, 0.00] at  $2\times$  gain,  $-0.01$  [-0.02,

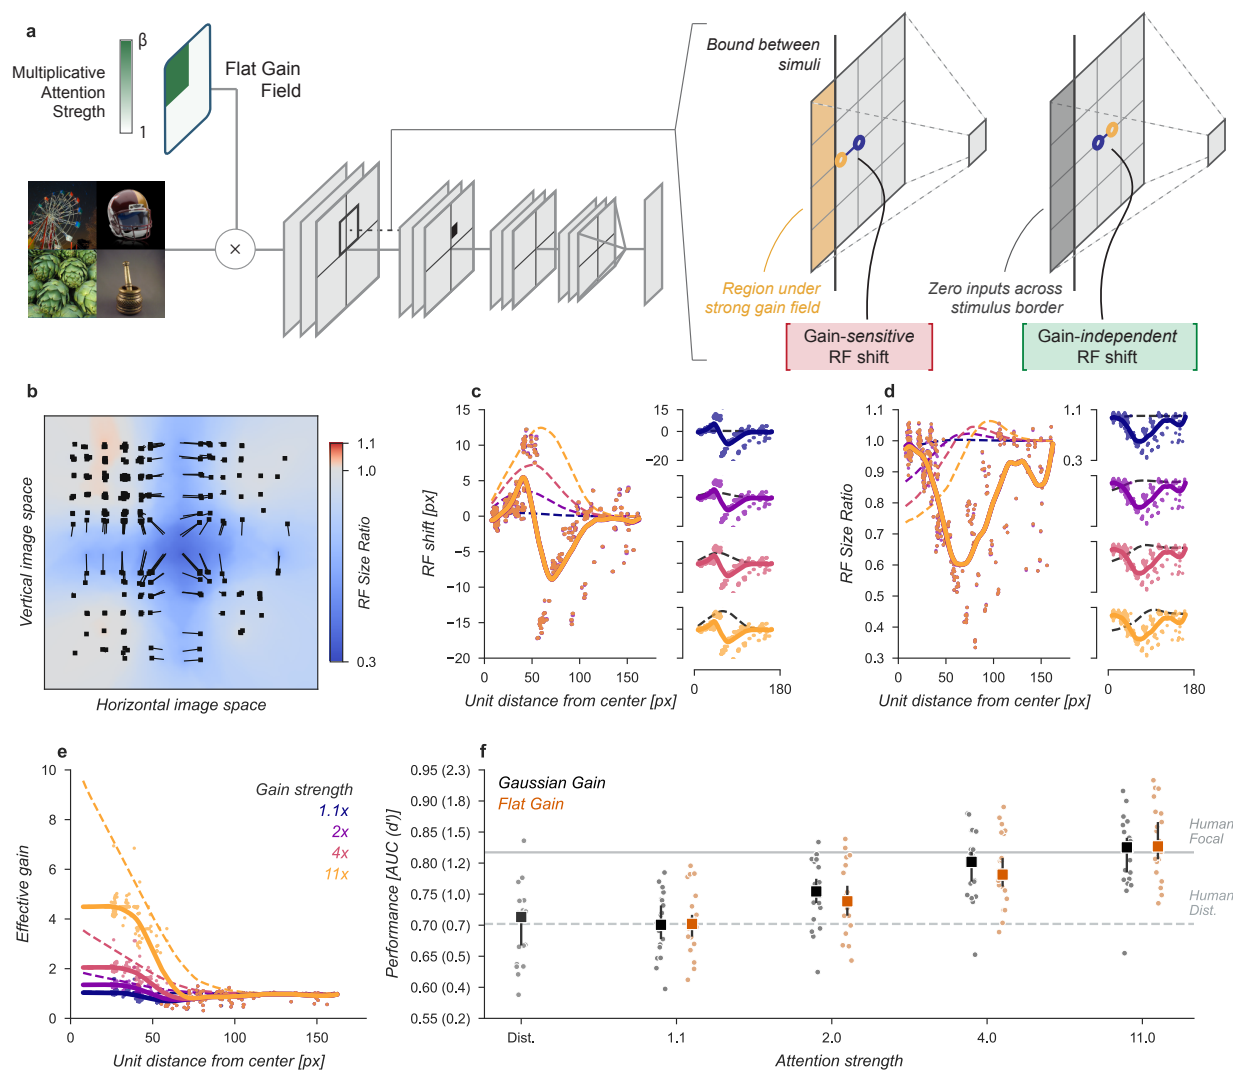

Figure 6: Gain-only model. (a) To create a gain effect without modifying the receptive fields of units we applied a flattened gain field, with the gain set to the average of the original Gaussian gain for each attention strength. The flat gain alone causes units to shift their receptive field at the boundary between the four stimulus quadrants, to modify gain while ensuring shifts were gain-independent we computed the four quadrants separately with zero padding and then concatenated the results. (b-f) conventions as in previous figures.

215 0.00] at  $4\times$  gain, and 0.02 [0.00, 0.04] at  $11\times$  gain.

216 Having found that the behavioral enhancement could be explained not by receptive field changes, but instead  
217 by the change in the overall activation strength, we asked whether this increased activation strength propagated  
218 through the network was both necessary and sufficient to explain behavioral enhancement. To test necessity and  
219 sufficiency we ran the task images through the Gaussian gain model (first row, Fig. 7a) and measured the effective  
220 gain propagated to units in the final layer output ( $7 \times 7 \times 512$ , before averaging). We averaged these effective  
221 gains over features to obtain a propagated gain map (Layer 4 feature map,  $7 \times 7$ , Fig. 7b). To test the hypothesis  
222 that this propagated gain was sufficient to account for the behavioral effect we re-applied it to the output layer  
223 of a model with no gain applied.

224 We found that the propagated gain map, when used to multiply the outputs of a model with no Gaussian gain  
225 (Multiply by propagated gain, Fig. 7a) was sufficient to reconstruct the behavioral benefits of Gaussian gain  
226 applied to the input (Propagated gain vs. Gaussian gain, Fig. 7c). The median AUC across categories using the  
227 propagated gain map was 0.72, 95% CI [0.68, 0.75], compared to 0.71 [0.67, 0.72] in the distributed model. The  
228 propagated gain map is not a perfect replacement for the Gaussian gain and we found that within categories there  
229 was a median drop in AUC within categories of -0.02 [-0.03, 0.01] when replacing the full Gaussian gain model  
230 with the propagated map multiplication.

231 To test the hypothesis that the propagated gain was necessary to account for the behavioral effect we divided  
232 the final layer activations by the propagated gain map (Divide by propagated gain, Fig. 7a). We found that the  
233 behavioral effect of an early gain was reversed by this manipulation (Removed gain vs. Distributed, Fig. 7c). The  
234 median AUC across categories after dividing out the propagated gain was 0.72, 95% CI [0.68, 0.75], compared  
235 to 0.71 [0.67, 0.72] in the distributed condition. Dividing by the propagated map did not perfectly reverse the  
236 Gaussian gain, we found a median AUC improvement within categories of 0.02 [0.01, 0.03].

## 237 Discussion

238 Human observers are more accurate when trying to detect objects at a cued location. Our results demonstrate  
239 that this behavioral benefit can also be observed in a neural network model of visual cortex when a Gaussian gain is  
240 applied over the pixels of a “cued” object. To determine the source of this behavioral benefit we explored different  
241 mechanisms of attention in a series of neural network observer models. In the shift-only model we re-wired units  
242 to move receptive fields without introducing gain and found that this produced no behavioral benefits. In the

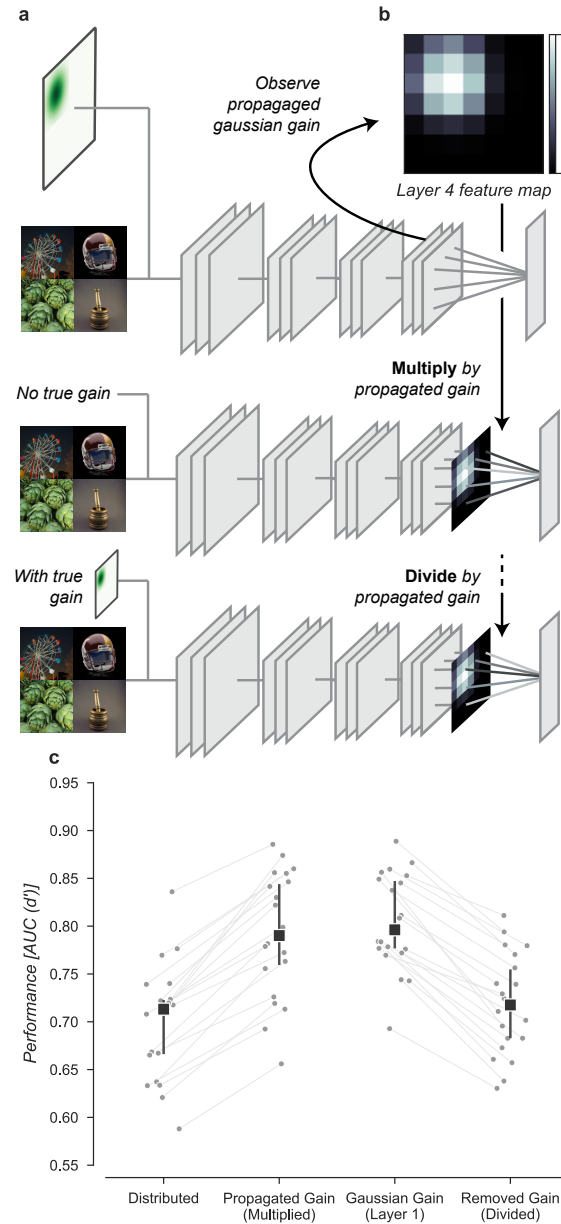

Figure 7: Gain is both necessary and sufficient to explain the behavioral effects of attention. (a) To test necessity and sufficiency of gain on performance we propagated the effect of Gaussian gain through the model and measured the effective gain at the output layer. (b) We averaged the effective gain across features to obtain a “propagated gain map”. To test sufficiency we multiplied the output of a model with no true gain by the propagated gain map. To test necessity we divided the output of a model with true gain by the propagated gain map. (c) Multiplying the output by the propagated gain recovered the effect of Gaussian gain, while dividing removed this effect, confirming that gain was both necessary and sufficient to account for the behavior. Markers indicate the median and error bars the 95% confidence intervals.



243 sensitivity-shift model we modified the spatial tuning of individual units to mimic the effect of gain but again found  
244 no behavioral benefits. It was only by applying a gain while keeping receptive field properties stable that we were  
245 able to reproduce the behavioral benefits of the original Gaussian gain. In line with this, we found that applying  
246 gain at the final layer was both necessary and sufficient to account for the behavioral benefits of spatial attention.  
247 Our results demonstrate that spatial gain is sufficient to increase the weight of relevant visual information on  
248 decision-making. While gain can change receptive field properties, our results suggest that these are secondary  
249 effects and only a consequence of applying gain, rather than the cause of the behavioral improvements as others  
250 have suggested.

251 We tested our hypothesis using an image-computable model, which has the benefit that all of the computational  
252 steps from sensory input to decision making are constrained by the model architecture. In our case, the advantage  
253 of this type of model is that the model architecture encodes the relationship between gain and receptive field  
254 shift: any time a gain occurs in an asymmetrical manner across a receptive field, downstream units will show an  
255 apparent “shift” in position. Many of the previous studies which have probed the mechanisms of spatial attention  
256 have used computational models which linked only the measurements which they made in their experiments,  
257 usually without specifying any direct connection between gain and receptive field shift. We know from the large  
258 literature exploring the physiology of attention that receptive field shifts are correlated with spatial attention  
259 (Anton-Erxleben & Carrasco, 2013; Anton-Erxleben et al., 2007; Anton-Erxleben et al., 2009; Fischer & Whitney,  
260 2009; Kay et al., 2015; Vo et al., 2017; Womelsdorf et al., 2006) and several authors have proposed computational  
261 mechanisms to explain how shifts could account for enhanced behavior. For example, receptive field shifts could  
262 increase the information capacity of a population of neurons by reducing spatial uncertainty about position (Kay  
263 et al., 2015) or enhancing discriminability (Vo et al., 2017). Although these computational models accurately  
264 described the visual system they failed to compare different possible model architectures (Gardner & Merriam,  
265 2021), in particular architectures where gain and shift are linked. By using a model designed to mimic the  
266 visual system and built from independent data, we believe our analysis is more likely to reveal the true relationship  
267 between behavioral performance and receptive field properties. For this task, behavior appears to be solely affected  
268 by spatial signal gain.

269 Our analysis is limited by the accuracy of the neural network observer model. There are several reasons to  
270 suggest that the model captures properties of both object recognition and the primate visual system that are  
271 relevant to testing mechanisms of attention. We chose to analyze a CNN whose architecture was designed to  
272 reflect the primate visual system and that was evaluated by comparing the similarity of CNN unit activity against  
273 measurements of single unit activity in the primate visual cortex (Schrimpf et al., 2018). After training, the image  
274 features that the CNN units become selective for align closely with those that activate single units in visual cortex

275 (Carter et al., 2019; Yamins et al., 2014). In addition, the designers of the architecture we used (CORnet, Kubilius  
276 et al. (2018) optimized for “core object recognition”, detecting a dominant object during a viewing duration of  
277 natural fixation (100-200 ms) in the central visual field (10 deg). We re-used core object recognition in our human  
278 object detection task and projected our test images in a 10 degree square aperture to obtain similar perceptual  
279 characteristics. In the analysis of our task we showed that distributed performance was similar for humans and  
280 the CNN at around 65 ms, confirming that the intended design of CORnet generalized to the new dataset and  
281 task that we used.

282 One of the main differences between convolutional neural networks and the primate visual cortex comes from the  
283 different ways in which units and neurons project their activation between layers. In our analysis, this was most  
284 apparent in the scale of the gain necessary to produce human-matched behavioral enhancements during spatial  
285 attention. In the Gaussian gain CNN the model passes the gain from layer to layer in a linear manner and we  
286 found that a gain of about  $4\times$  was needed to reproduce human behavioral enhancement. For comparison, neural  
287 recordings in primates have measured an attentional effect on the order of a 20-40% gain ( $1.2-1.4\times$ ) (Luck et al.,  
288 1997; Treue & Trujillo, 1999). When we added a local selection mechanism implemented by divisive gain control  
289 to mimic the way that visual cortex selects and amplifies the strongest signals (Kaiser et al., 2016; Pestilli et al.,  
290 2011) we found that the CNN observer model required a much smaller gain of  $1.25\times$ , which when amplified across  
291 four layers could produce the necessary combination of gain and selection required to reproduce the behavioral  
292 effect. Such non-linear selection mechanisms are thought to be a critical component of attention (Pestilli et al.,  
293 2011) and could be achieved by normalization of signals in visual cortex (Carandini & Heeger, 2012). This analysis  
294 does not imply that gain must be applied early in the visual hierarchy. Although physiological measurements have  
295 found evidence for this (Luck et al., 1997; McAdams & Maunsell, 1999; Motter, 1993), it is equally possible that  
296 the gain is applied at a late stage close to decision making and signal gains early in visual cortex are a result of  
297 backward projections to these areas (Buffalo et al., 2010).

298 Our finding that changing the tuning of units has little effect on behavior implies that the preferred features of units  
299 are a poor proxy for determining their influence on decision making (Lindsay & Miller, 2018). In theory, the visual  
300 system has the capacity to identify neurons that respond strongly to particular visual features and boost these to  
301 improve behavioral performance. In practice, Lindsay and Miller (2018) have shown that this is computationally  
302 inferior to magnifying unit activity according to the gradient on the output. In addition, feature sensitivity appears  
303 to be weakly correlated with the gradient of a unit on output behavior, with the implication that this is also true in  
304 the visual system. This leads to what could be a paradox: if you want to attend to complex features, how do you  
305 design a system to target the particular units with strong gradients on downstream decision-making areas? Our  
306 results, as well as the finding that attention can sometimes reduce perceptual performance (Yeshurun & Carrasco,

307 1998), suggest that the attention system doesn't solve this problem directly but instead deploys non-specific gain.  
308 Instead of over-optimizing the attentional system for every possible visual target, attention seems to operate over  
309 a more limited set of features. Visual search tasks suggest that this set of features is limited to a few basic  
310 elements, possibly color, orientation, motion, size, and position (Wolfe & Horowitz, 2004). Because these basic  
311 feature detectors are combined by the visual system to create complex neurons it is in some sense unsurprising  
312 that when we measure high-level features, even those as simple as the receptive fields in late layers, these appear  
313 to be the targets of attentional effects. In fact, these apparent effects of attention may simply be epiphenomena  
314 as we have demonstrated.

315 Our finding conceptually shifts experimental and theoretical work on neural mechanisms of attention. The vast  
316 literature on receptive field size and location shifts due to attention provide only a suggestion that these effects  
317 could underlie behavioral enhancement, but do not test that hypothesis explicitly. By using computational mod-  
318 eling we tested this directly and find strong support for gain as the fundamental mechanism driving behavioral  
319 enhancement with attention.

## 320 **Methods**

### 321 **Human observers**

322 Seven observers were subjects for the experiments (1 female, 6 male, mean age 22 y, range 19-24). All observers  
323 except one (who was an author) were naïve to the intent of the experiments. No observers were excluded during  
324 the initial training sessions (see eye-tracking below). Observers completed 1600 trials in two 60 minute sessions.  
325 Observers wore lenses to correct vision to normal if needed. Procedures were approved in advance by the Stanford  
326 Institutional Review Board on human participants research and all observers gave prior written informed consent  
327 before participating.

### 328 **Hardware setup for human observers**

329 Visual stimuli were generated using MATLAB (The Mathworks, Inc.) and MGL (Gardner et al., 2018). Stimuli  
330 were displayed at 60 cm viewing distance on a 22.5 inch VIEWPixx LCD display (resolution of 1900x1200, refresh-  
331 rate of 120 Hz) and responses collected via keyboard. Experiments were performed in a darkened room where  
332 extraneous sources of light were minimized.

333 Eye-tracking was performed using an infrared video-based eye-tracker at 500 Hz (Eyelink 1000; SR Research).  
334 Calibration was performed at the start of each session to get a validation accuracy of less than 1 degree average  
335 offset from expected, using a thirteen-point calibration procedure. During training, trials were initiated by fixating  
336 the central cross for 0.5 s and canceled on-line when an observer's eye position moved more than 1.5 degree away  
337 from the center of the fixation cross for more than 0.3 s. Observers were excluded prior to data collection if  
338 we were unable to calibrate the eye tracker to an error of less than 1 degree of visual angle or if their canceled  
339 trial rate did not drop to near zero, all of the observers passed these criteria. During data collection the online  
340 cancellation was disabled and trials were excluded if observers made a saccade outside of fixation ( $> 1.5\text{deg}$ )  
341 during the stimulus period.

## 342 **Experimental Design**

343 We compared the ability of humans and neural networks to detect objects in a grid of four images covering 10  
344 degrees of visual angle (224 px). Given a grid of images, the observers were asked to identify whether or not  
345 a particular target category was present. On half of the trials we gave observers prior information telling them  
346 which of the four grid locations could contain the object (100% valid cue). This focal condition was compared  
347 with a distributed condition, in which no information was provided about which grid location could contain the  
348 target object. For humans, the prior in the focal condition was a spatial cue, a visual pointer to one corner of the  
349 grid. For the neural network model, the prior for the focal condition was implemented by a mechanistic change  
350 in the model architecture, which differed according to the model of attention being tested.

## 351 **Stimuli**

352 The stimuli presented to both humans and the neural network observer model were composed of four base images  
353 arranged in a grid (henceforth a "composite grid"). Each base image contained an exemplar of one of 21 ImageNet  
354 (Deng et al., 2009) categories. Composite grids always contained images from four different categories. The base  
355 images were cropped to be square, and resized to  $122 \times 122$  pixels, making each composite grid  $224 \times 224$   
356 pixels. We pulled 929 images from each of 21 ImageNet categories: analog clock (renamed to "clock"), artichoke,  
357 bakery (renamed to "baked goods"), banana, bathtub, bonsai tree (renamed to "tree"), cabbage butterfly, coffee,  
358 computer, Ferris wheel, football helmet, garden spider (renamed to "spider"), greenhouse, home theater, long-  
359 horned beetle (renamed to "beetle"), mortar, padlock, paintbrush, seashore, stone wall, and toaster. These base  
360 images were usually representative of their category. However, many included other distracting elements (people,

361 text, strong reflections, etc). Two authors (KF and DB) selected 100 base images for each category absent of  
362 distracting elements (low-distraction base images) to be used for the human task. From these low-distraction  
363 base images we set aside 5 to use as exemplars when introducing the category to human participants.

364 To create the human stimulus set we generated composite grids for each of the 20 target categories. Each category  
365 required 80 composite grids: 40 including target objects and 40 without. We therefore needed 40 base images  
366 from the target category and 280 ( $3 \times 40 + 4 \times 40$ ) base images from the non-target categories. We sampled all  
367 images from the low-distraction base images. Targets were placed 10 times in each of the four corners.

368 The neural network observer model was trained and tested on an expanded stimulus set. We set aside 50 base  
369 images for each category to train the linear classifiers (see Linear Classifiers, below). The approach was otherwise  
370 identical to that described above, but 829 composite grids were created with a target and 829 without. Because  
371 CNN models are translation invariant we formed all target composites with the target base image in the NW  
372 corner, to simplify analysis.

## 373 **Human task**

374 Human observers performed blocks of trials in which they had to report the presence or absence of a specified  
375 category in composite grids. At the start of each block we showed the human observers the words "Search for:"  
376 followed by the name of the current target category (Fig. 1a, Category). They were then shown five held-out  
377 (i.e. not shown in the task) exemplar base images to gain familiarity with the target category (Fig. 1a, Examples)  
378 and advanced through these with a self-paced button click. This was followed by individual trials of the task.  
379 At all times a fixation cross (0.5 deg diameter, white) was visible at the center of the screen in front of a black  
380 circle (1 deg diameter). This fixation region obscured the center of the composite grid, but made maintaining  
381 fixation easier for observers. At the start of each trial the pixels of the current composite grid were scrambled to  
382 create a luminance-matched visual mask. This was displayed until an observer maintained fixation for 0.3 s (Fig.  
383 1a, "Fixation"). Once fixation was acquired a cue was shown for 0.75 s, informing the observer about whether  
384 the trial was focal (in which case the possible target location was indicated) or distributed (four possible target  
385 locations indicated). The focal cue was a 0.25 deg length white line pointing toward the cued corner of the grid.  
386 The distributed cue was four 0.25 deg length white lines pointing toward all four corners of the grid. Distributed  
387 and focal cues were presented in pseudo-randomized order throughout each block. The cue was followed by a  
388 0.75 s inter-stimulus interval (Fig. 1a, Delay) before the composite grid ( $10 \times 10$  deg) was shown for either 1  
389 (0.008 s), 2 (0.017), 4 (0.033), 8 (0.067), 16 (0.133), or 32 (0.267) video frames (Fig. 1a, Stimulus). The mask

390 then replaced the stimulus and observers were given 2 s to make a response (Fig. 1a, Response), pressing the  
 391 “1” key for target present or the “2” key for absent. Feedback was given by changing the fixation cross color to  
 392 green for correct and red for incorrect until the 2 s period elapsed. A 0.25 s inter-trial interval separated trials.

393 Observers completed one training block (the “tree” category) as practice before data collection began. They then  
 394 completed each category block (40 focal trials with 20 target present and 20 target absent, and 40 distributed  
 395 trials with 20 target present and 20 target absent) before moving on to the next category. Block order was  
 396 pseudo-randomized for each observer. Each block took about five minutes to complete and a break was provided  
 397 between blocks, as needed. In total the experiment took about two hours, split into two one hour sessions on  
 398 different days.

### 399 Neural network observer model

400 We modeled the ventral visual pathway using CORnet-Z, a convolutional neural network (CNN) proposed by  
 401 Kubilius et al. (2018). The model consists of four convolutional layers producing feature maps of decreasing  
 402 spatial resolution (Table 1). The model which we used was trained on ImageNet, details can be found in Kubilius  
 403 et al. (2018). At the last convolutional layer we took the average over the spatial dimensions of each feature map  
 404 to create the neural network’s representation (512-dimensional vector) of the input image.

|           | Layer Type     | Kernel Size  | Output Shape               | FWHM (px, deg) |
|-----------|----------------|--------------|----------------------------|----------------|
|           | Input          |              | $224 \times 224 \times 3$  |                |
| V1 Block  | conv, stride=2 | $7 \times 7$ | $112 \times 112 \times 64$ | 11 (0.5)       |
|           | max pool       | $2 \times 2$ | $56 \times 56 \times 64$   |                |
|           | ReLU           |              | $56 \times 56 \times 64$   |                |
| V2 Block  | conv           | $3 \times 3$ | $56 \times 56 \times 128$  | 26.8 (1.21)    |
|           | max pool       | $2 \times 2$ | $28 \times 28 \times 128$  |                |
|           | ReLU           |              | $28 \times 28 \times 128$  |                |
| V4 Block  | conv           | $3 \times 3$ | $28 \times 28 \times 256$  | 55.6 (2.52)    |
|           | max pool       | $2 \times 2$ | $14 \times 14 \times 256$  |                |
|           | ReLU           |              | $14 \times 14 \times 256$  |                |
| IT Block  | conv           | $3 \times 3$ | $14 \times 14 \times 512$  | 111.4 (5.06)   |
|           | max pool       | $2 \times 2$ | $7 \times 7 \times 512$    |                |
|           | ReLU           |              | $7 \times 7 \times 512$    |                |
| Encodings | avg. pool      |              | $1 \times 1 \times 512$    |                |

Table 1: CORnet-Z structure. Average receptive field (RF) full-width at half-maximum (FWHM) is measured using ellipses fit to the backpropagated gradients of units in a convolutional layer with respect to the input image pixels. 22.4 pixels corresponds to one degree of visual angle (Kubilius et al., 2018).

## 405 **Linear classifiers**

406 To allow the neural network observer model to perform an object detection task we trained a set of linear classifiers  
407 on the model output to predict the presence or absence of each of the twenty target categories. Each of these  
408 fully-connected layers received as input the (512-dimensional) feature output from the CNN and projected these  
409 to a scalar output. Weights were fit using logistic regression, using *scikit-learn* and the *LIBLINEAR* package  
410 (Pedregosa et al., 2011). We trained the classifiers on a held out set of base images not used to generate the  
411 task grids, using 50 images with the target present and 50 images with the target absent.

412 To test model performance in the detection task the observer model was presented with each of the composite  
413 grids in the full image set. We report the model's area under the curve (AUC) as a measure of performance.

## 414 **Spatial attention: Gaussian gain model**

415 To introduce Gaussian gain as a mechanism for spatial attention we multiplied the pixel intensity of the input  
416 image at row  $r$  and column  $c$  by the magnitude of a 2-dimensional Gaussian, using the following equation:

$$g_{r_0, c_0, \sigma, \beta}(r, c) = (\beta - 1) \exp\left(-\frac{(r - r_0)^2 + (c - c_0)^2}{2\sigma^2}\right) + 1 \quad (2)$$

417 Where  $r_0$  and  $c_0$  set the row and column location for the center of the gain field and  $\beta$  controls the strength,  
418 i.e. the multiplicative factor at the peak of the Gaussian. The Gaussian was centered in the cued quadrant and  
419  $\sigma$  was set to 56 pixels (approx 2.5 degrees). We explored four values of  $\beta$ : 1.1, 2, 4, and 11.

## 420 **Quantifying the effects of gain on receptive fields and activations**

421 To reduce computational requirements we randomly sampled 300 units per layer (1,200 total units) for receptive  
422 field analysis, with higher density near the attended locus.

423 To determine the location and size of the receptive field of each CNN unit we computed the derivative of their  
424 activation with respect to the pixels in the input image. This derivative was taken across a batch of 40 task  
425 images evenly distributed across categories. The magnitude of derivatives with respect to the red green and blue  
426 channels were summed to create a sensitivity map. Receptive field location and size were estimated by fitting a  
427 2D Gaussian distribution to the sensitivity map. The Gaussian fit was performed by treating the sensitivity map

428 as an unnormalized probability distribution and choosing the Gaussian with the same the mean and covariance  
429 matrix as that distribution. Receptive field location was measured as the mean of the Gaussian fit. We report the  
430 full-width at half-maximum for the receptive field size.

431 To measure the effect of gain on the activation of CNN units we computed the effective gain and feature correlation  
432 across the sampled units. We defined effective gain as the ratio between the standard deviation of a unit's activity  
433 after applying an attention mechanism compared to before. We also measured the feature correlation at each  
434 spatial location by taking the Pearson correlation of the sampled unit activation with and without an attentional  
435 mechanism applied. We computed the effective gain and correlation measures across all features and all stimuli.

### 436 **Nonlinear normalization**

In order to test the ability of “winner-take-all” normalization to amplify small gains, we isolated the first layer  
of the CNN, and applied nonlinear normalization with exponent  $\xi$ . More precisely, if the output feature map of  
the first layer had size  $M$  rows by  $N$  columns by  $C$  channels and activations  $a_{ijc}$ , we calculated the normalized  
outputs

$$b_{ijc} = \frac{\sum_{k,l,d=1}^{M,N,C} |a_{kld}|}{\sum_{k,l,d=1}^{M,N,C} |a_{kld}|^\xi} a_{ijc}^\xi.$$

437 To measure the resulting amplified gain we applied a small Gaussian gain between  $1\times$  and  $1.25\times$  to the input  
438 image in the same manner as in the full Gaussian gain model. We then measured the ratio of average effective  
439 gain for units contained entirely within the gain field against the average effective gain of units entirely outside  
440 the attention gain field.

### 441 **Spatial attention: Shift-only model**

442 In the Gaussian gain model we applied the gain at layer 1 and observed changes in the model's detection perfor-  
443 mance at the output layers. We took a parallel approach here to design a model that could mimic the receptive  
444 field shifts at layer 4 (induced by gain at layer 1) while producing no systematic effect on response gain. To cause  
445 the layer 4 units to observe different parts of the input image we shifted the connections between pixels in the  
446 input image and first layer. We preserved all other connections, so layer 4 units of the neural network continued  
447 to receive information from the same layer 1 units.

448 To obtain the size of connection shifts we created a “shift map” in input image space by measuring the distance  
449 and direction that layer 4 units moved when the Gaussian gain was applied. To make this measurement, we took



450 each input image pixel location  $(r, c)$  and calculated the average receptive field shift of the 20 sampled layer 4  
451 units with the closest receptive field centers without attention. Because we used a sampling procedure and not  
452 the full set of layer 4 units we weighted the sampled units by their Euclidean distance from the target pixel.  
453 To reduce noise in the shift map we applied a Gaussian blur with  $\sigma = 8$  pixels. Using the shift map, we then  
454 re-assigned the connections from the input image to the layer 1 units so that these would reproduce the shifts  
455 observed in layer 4. The simplest way to to implement this involved swapping the activation of each layer 1 unit  
456 with the activation of the unit at its shifted location. For example, if unit  $(75, 75)$  was shifted by  $(-10, -10)$  we  
457 assigned it the activation of the unit at  $(65, 65)$ . To deal with decimal shifts we performed linear interpolation  
458 using neighboring units.

### 459 **Spatial attention: Sensitivity shift by local gain**

460 In the sensitivity shift model we aimed to mimic the spatial tuning changes induced by the Gaussian gain at a  
461 particular layer but without changing the effective gain of units. To do to this, we first computed the true gain  
462 propagated to the target layer  $L$  by scaling the Gaussian gain map to the size of layer  $L - 1$ 's feature map. With  
463 this change alone the weights of units closer to the locus of attention are scaled more than the weights farther  
464 from the locus, introducing differential gain. To avoid a change in the overall scale of units' weights, we re-scaled  
465 the kernel to match the L2-norm (sum-of-squares) of the original kernel weights.

466 To summarize, suppose that layer  $L - 1$ 's feature map is  $t$  times the size of the input image so that a unit at  
467 row  $r$  and column  $c$  of the layer  $L - 1$  feature map has an effective effective gain of  $g_{tr_0, tc_0, t\sigma, \beta}(tr, tc)$  under the  
468 Gaussian gain model. Then if  $w \in \mathbb{R}^N$  is the original weight vector of a unit in the unraveled convolution at layer  
469  $L$  whose input vector  $a \in \mathbb{R}^N$  contains the activations of post-ReLU units of layer  $L - 1$ , and if the row-column  
470 positions in the  $L - 1$  feature map of the unit described by  $a_i$  is  $(r_i, c_i)$ , then the replacement weight vector in  
471 the sensitivity shift model is given by the vector  $w' \in \mathbb{R}^N$ , whose entries are:

$$w'_i = \left( \frac{\sum_{i=1}^N w_i^2}{\sum_{i=1}^N w_i^2 g_{tr_0, tc_0, t\sigma, \beta}(tr_i, tc_i)^2} \right)^{1/2} w_i,$$

### 472 **Spatial attention: Gain-only model**

473 We designed a model which could effect gain without receptive field shift by flattening the gain in the cued  
474 quadrant. Receptive field shifts occur because there is a differential gain across the receptive field of a unit. To

475 get rid of this, you can simply put a flat gain across the cued quadrant. This naive approach has the problem  
476 that units that overlap two quadrants will still shift and shrink according to the strength of the gain. To prevent  
477 these units from shifting in a manner correlated to the gain we separated the CNN feature maps into four parts  
478 corresponding to the four image quadrants, ran the model forward with zero padding around each quadrant, and  
479 then concatenated the results back together. This ensured that each unit experienced a flat gain across its inputs  
480 and that as gain increased units near the quadrant boundaries did not experience gain-dependent receptive field  
481 shift or shrinkage.

## 482 **Necessary and sufficient test**

483 To obtain a propagated gain map in the final layer output we applied the Gaussian gain to the start of the  
484 neural network observer model and measured the average effective gain of the  $7 \times 7$  layer 4 output units across  
485 a representative sample of images. We call this the “propagated gain map”, since it represents the effect of the  
486 input gain on the output layers. We tested necessity by dividing the network output by the map for a model with  
487 gain applied and we tested sufficiency by multiplying the outputs from a no-gain model.

## 488 **Behavioral analysis**

489 We analyzed the human behavioral data by binning trials according to their duration and computing sensitivity  $d'$   
490 from the equation:

$$d' = Z(H) - Z(FA) \quad (3)$$

491 Where  $Z$  is the inverse of the cumulative normal distribution and  $H$  and  $FA$  are the hit and false alarm rate,  
492 respectively. We fit a logarithmic function to the  $d'$  data using the equation:

$$d'(t) = \alpha * \log(\kappa t + 1) \quad (4)$$

493 Where  $t$  is the stimulus duration and  $\alpha$  and  $\kappa$  are parameters that control the shape of the logarithmic function.

494 To compare human and model performance we can also convert between  $d'$  and the area under the curve (AUC)  
495 by the equation:

$$d' = \sqrt{2}Z(AUC) \quad (5)$$

## 496 **Confidence intervals**

497 All error bars are calculated by bootstrapping the given statistic with  $n = 1000$  and reported as the 95% confidence  
498 interval.

## 499 **Data and code availability**

500 The images and composite grids used in this study as well as the code necessary to replicate our analyses are  
501 available in the Open Science Framework with the identifier 10.17605/OSF.IO/AGHQK.

## 502 **Acknowledgments**

503 We acknowledge the generous support of Research to Prevent Blindness and Lions Clubs International Foundation,  
504 and the Hellman Fellows Fund to JLG as well as the UW Vision Training Grant (NEI T32EY07031) and Washington  
505 Research Foundation Postdoctoral Fellowship to DB. We thank Josh Wilson for help with data collection and  
506 Eline Kupers and Maggie Henderson for early discussions.

## 507 **Contributions**

508 All of the authors conceived of and designed research, interpreted results of experiments, edited and revised  
509 the manuscript, and approved the final version of the manuscript. KF performed neural network experiments,  
510 analyzed data, and prepared figures. DB performed human behavioral experiments, analyzed data, and drafted  
511 the manuscript.

## 512 **References**

513 Albrecht, D. G., & Hamilton, D. B. (1982). Striate cortex of monkey and cat: Contrast response function. *Journal*  
514 *of neurophysiology*, 48(1), 217–237.

- 515 Anton-Erxleben, K., & Carrasco, M. (2013). Attentional enhancement of spatial resolution: Linking behavioural  
516 and neurophysiological evidence. *Nature Reviews Neuroscience*, *14*(3), 188–200.
- 517 Anton-Erxleben, K., Henrich, C., & Treue, S. (2007). Attention changes perceived size of moving visual patterns.  
518 *Journal of Vision*, *7*(11), 5–5.
- 519 Anton-Erxleben, K., Stephan, V. M., & Treue, S. (2009). Attention reshapes center-surround receptive field  
520 structure in macaque cortical area mt. *Cerebral cortex*, *19*(10), 2466–2478.
- 521 Ben Hamed, S., Duhamel, J.-R., Bremmer, F., & Graf, W. (2002). Visual receptive field modulation in the lateral  
522 intraparietal area during attentive fixation and free gaze. *Cerebral cortex*, *12*(3), 234–245.
- 523 Birman, D., & Gardner, J. L. (2019). A flexible readout mechanism of human sensory representations. *Nature*  
524 *communications*, *10*(1), 1–13.
- 525 Buffalo, E. A., Fries, P., Landman, R., Liang, H., & Desimone, R. (2010). A backward progression of attentional  
526 effects in the ventral stream. *Proceedings of the National Academy of Sciences*, *107*(1), 361–365.
- 527 Cadena, S. A., Denfield, G. H., Walker, E. Y., Gatys, L. A., Tolia, A. S., Bethge, M., & Ecker, A. S. (2019). Deep  
528 convolutional models improve predictions of macaque v1 responses to natural images. *PLoS computational*  
529 *biology*, *15*(4), e1006897.
- 530 Carandini, M., & Heeger, D. J. (2012). Normalization as a canonical neural computation. *Nature Reviews Neu-*  
531 *roscience*, *13*(1), 51–62.
- 532 Carrasco, M. (2011). Visual attention: The past 25 years. *Vision research*, *51*(13), 1484–1525.
- 533 Carter, S., Armstrong, Z., Schubert, L., Johnson, I., & Olah, C. (2019). Activation atlas [[https://distill.pub/2019/activation-](https://distill.pub/2019/activation-atlas)  
534 [atlas](https://distill.pub/2019/activation-atlas)]. *Distill*. <https://doi.org/10.23915/distill.00015>
- 535 Cichy, R. M., Khosla, A., Pantazis, D., Torralba, A., & Oliva, A. (2016). Comparison of deep neural networks to  
536 spatio-temporal cortical dynamics of human visual object recognition reveals hierarchical correspondence.  
537 *Scientific reports*, *6*(1), 1–13.
- 538 Colby, C. L., & Goldberg, M. E. (1999). Space and attention in parietal cortex. *Annual review of neuroscience*,  
539 *22*(1), 319–349.
- 540 Colby, C., Goldberg, M. E. et al. (1992). The updating of the representation of visual space in parietal cortex by  
541 intended eye movements. *Science*, *255*(5040), 90–92.
- 542 Connor, C. E., Gallant, J. L., Preddie, D. C., & Van Essen, D. C. (1996). Responses in area v4 depend on the  
543 spatial relationship between stimulus and attention. *Journal of neurophysiology*, *75*(3), 1306–1308.
- 544 Deng, J., Dong, W., Socher, R., Li, L.-J., Li, K., & Fei-Fei, L. (2009). ImageNet: A Large-Scale Hierarchical  
545 Image Database, In *Cvpr09*.

- 546 Eckstein, M. P., Thomas, J. P., Palmer, J., & Shimozaki, S. S. (2000). A signal detection model predicts the  
547 effects of set size on visual search accuracy for feature, conjunction, triple conjunction, and disjunction  
548 displays. *Perception & psychophysics*, *62*(3), 425–451.
- 549 Eickenberg, M., Gramfort, A., Varoquaux, G., & Thirion, B. (2017). Seeing it all: Convolutional network layers  
550 map the function of the human visual system. *NeuroImage*, *152*, 184–194.
- 551 Fischer, J., & Whitney, D. (2009). Attention narrows position tuning of population responses in v1. *Current*  
552 *biology*, *19*(16), 1356–1361.
- 553 Gardner, J. L., Anzai, A., Ohzawa, I., & Freeman, R. D. (1999). Linear and nonlinear contributions to orientation  
554 tuning of simple cells in the cat's striate cortex. *Visual neuroscience*, *16*(6), 1115–1121.
- 555 Gardner, J. L., & Merriam, E. P. (2021). Population models, not analyses, of human neuroscience measurements.  
556 *Annual Review of Vision Science*, *7*, 225–255.
- 557 Gardner, J. L., Merriam, E. P., Schluppeck, D., & Larsson, J. (2018). MGL: Visual psychophysics stimuli and  
558 experimental design package. *Zenodo*.
- 559 Güçlü, U., & van Gerven, M. A. (2015). Deep neural networks reveal a gradient in the complexity of neural  
560 representations across the ventral stream. *Journal of Neuroscience*, *35*(27), 10005–10014.
- 561 Hawkins, H. L., Hillyard, S. A., Luck, S. J., Mouloua, M., Downing, C. J., & Woodward, D. P. (1990). Visual  
562 attention modulates signal detectability. *Journal of Experimental Psychology: Human Perception and*  
563 *Performance*, *16*(4), 802.
- 564 Heeger, D. J. (1992). Half-squaring in responses of cat striate cells. *Visual neuroscience*, *9*(5), 427–443.
- 565 Kaiser, D., Oosterhof, N. N., & Peelen, M. V. (2016). The neural dynamics of attentional selection in natural  
566 scenes. *Journal of neuroscience*, *36*(41), 10522–10528.
- 567 Kay, K. N., Weiner, K. S., & Grill-Spector, K. (2015). Attention reduces spatial uncertainty in human ventral  
568 temporal cortex. *Current Biology*, *25*(5), 595–600.
- 569 Khaligh-Razavi, S.-M., & Kriegeskorte, N. (2014). Deep supervised, but not unsupervised, models may explain it  
570 cortical representation. *PLoS computational biology*, *10*(11), e1003915.
- 571 Klein, B. P., Harvey, B. M., & Dumoulin, S. O. (2014). Attraction of position preference by spatial attention  
572 throughout human visual cortex. *Neuron*, *84*(1), 227–237.
- 573 Krizhevsky, A., Sutskever, I., & Hinton, G. E. (2012). Imagenet classification with deep convolutional neural  
574 networks. *Advances in neural information processing systems*, *25*, 1097–1105.
- 575 Kubilius, J., Schrimpf, M., Nayebi, A., Bear, D., Yamins, D. L., & DiCarlo, J. J. (2018). Cornet: Modeling the  
576 neural mechanisms of core object recognition. *BioRxiv*, 408385.
- 577 Kusunoki, M., & Goldberg, M. E. (2003). The time course of perisaccadic receptive field shifts in the lateral  
578 intraparietal area of the monkey. *Journal of neurophysiology*, *89*(3), 1519–1527.

- 579 Lindsay, G. W., & Miller, K. D. (2018). How biological attention mechanisms improve task performance in a  
580 large-scale visual system model. *ELife*, *7*, e38105.
- 581 Luck, S. J., Chelazzi, L., Hillyard, S. A., & Desimone, R. (1997). Neural mechanisms of spatial selective attention  
582 in areas v1, v2, and v4 of macaque visual cortex. *Journal of neurophysiology*, *77*(1), 24–42.
- 583 McAdams, C. J., & Maunsell, J. H. (1999). Effects of attention on orientation-tuning functions of single neurons  
584 in macaque cortical area v4. *Journal of Neuroscience*, *19*(1), 431–441.
- 585 McIntosh, L. T., Maheswaranathan, N., Nayebi, A., Ganguli, S., & Baccus, S. A. (2016). Deep learning models  
586 of the retinal response to natural scenes. *Advances in neural information processing systems*, *29*, 1369.
- 587 Merriam, E. P., Genovese, C. R., & Colby, C. L. (2007). Remapping in human visual cortex. *Journal of neuro-*  
588 *physiology*, *97*(2), 1738–1755.
- 589 Moran, J., & Desimone, R. (1985). Selective attention gates visual processing in the extrastriate cortex. *Science*,  
590 *229*(4715), 782–784.
- 591 Motter, B. C. (1993). Focal attention produces spatially selective processing in visual cortical areas v1, v2, and  
592 v4 in the presence of competing stimuli. *Journal of neurophysiology*, *70*(3), 909–919.
- 593 Pedregosa, F., Varoquaux, G., Gramfort, A., Michel, V., Thirion, B., Grisel, O., Blondel, M., Prettenhofer, P.,  
594 Weiss, R., Dubourg, V., Et al. (2011). Scikit-learn: Machine learning in python. *the Journal of machine*  
595 *Learning research*, *12*, 2825–2830.
- 596 Pelli, D. G. (1985). Uncertainty explains many aspects of visual contrast detection and discrimination. *JOSA A*,  
597 *2*(9), 1508–1532.
- 598 Pestilli, F., Carrasco, M., Heeger, D. J., & Gardner, J. L. (2011). Attentional enhancement via selection and  
599 pooling of early sensory responses in human visual cortex. *Neuron*, *72*(5), 832–846.
- 600 Posner, M. I. (1980). Orienting of attention. *Quarterly journal of experimental psychology*, *32*(1), 3–25.
- 601 Ross, J., Morrone, M. C., & Burr, D. C. (1997). Compression of visual space before saccades. *Nature*, *386*(6625),  
602 598–601.
- 603 Sagi, D., & Julesz, B. (1986). Enhanced detection in the aperture of focal attention during simple discrimination  
604 tasks. *Nature*, *321*(6071), 693–695.
- 605 Schrimpf, M., Kubilius, J., Hong, H., Majaj, N. J., Rajalingham, R., Issa, E. B., Kar, K., Bashivan, P., Prescott-  
606 Roy, J., Schmidt, K., Et al. (2018). Brain-score: Which artificial neural network for object recognition is  
607 most brain-like? *BioRxiv*, 407007.
- 608 Sclar, G., Maunsell, J. H., & Lennie, P. (1990). Coding of image contrast in central visual pathways of the macaque  
609 monkey. *Vision research*, *30*(1), 1–10.
- 610 Sprague, T. C., & Serences, J. T. (2013). Attention modulates spatial priority maps in the human occipital,  
611 parietal and frontal cortices. *Nature neuroscience*, *16*(12), 1879–1887.

- 612 Storrs, K. R., Kietzmann, T. C., Walther, A., Mehrer, J., & Kriegeskorte, N. (2020). Diverse deep neural networks  
613 all predict human it well, after training and fitting. *bioRxiv*.
- 614 Tolias, A. S., Moore, T., Smirnakis, S. M., Tehovnik, E. J., Siapas, A. G., & Schiller, P. H. (2001). Eye movements  
615 modulate visual receptive fields of v4 neurons. *Neuron*, 29(3), 757–767.
- 616 Treue, S., & Trujillo, J. C. M. (1999). Feature-based attention influences motion processing gain in macaque  
617 visual cortex. *Nature*, 399(6736), 575–579.
- 618 van Es, D. M., Theeuwes, J., & Knapen, T. (2018). Spatial sampling in human visual cortex is modulated by  
619 both spatial and feature-based attention. *Elife*, 7, e36928.
- 620 Vo, V. A., Sprague, T. C., & Serences, J. T. (2017). Spatial tuning shifts increase the discriminability and fidelity  
621 of population codes in visual cortex. *Journal of Neuroscience*, 37(12), 3386–3401.
- 622 Wagenmakers, E.-J., Van Der Maas, H. L., & Grasman, R. P. (2007). An ez-diffusion model for response time  
623 and accuracy. *Psychonomic bulletin & review*, 14(1), 3–22.
- 624 Wolfe, J. M., & Horowitz, T. S. (2004). What attributes guide the deployment of visual attention and how do  
625 they do it? *Nature reviews neuroscience*, 5(6), 495–501.
- 626 Womelsdorf, T., Anton-Erxleben, K., Pieper, F., & Treue, S. (2006). Dynamic shifts of visual receptive fields in  
627 cortical area mt by spatial attention. *Nature neuroscience*, 9(9), 1156–1160.
- 628 Yamins, D. L., Hong, H., Cadieu, C. F., Solomon, E. A., Seibert, D., & DiCarlo, J. J. (2014). Performance-  
629 optimized hierarchical models predict neural responses in higher visual cortex. *Proceedings of the national  
630 academy of sciences*, 111(23), 8619–8624.
- 631 Yeshurun, Y., & Carrasco, M. (1998). Attention improves or impairs visual performance by enhancing spatial  
632 resolution. *Nature*, 396(6706), 72–75.
- 633 Zirnsak, M., Steinmetz, N. A., Noudoost, B., Xu, K. Z., & Moore, T. (2014). Visual space is compressed in  
634 prefrontal cortex before eye movements. *Nature*, 507(7493), 504–507. [https://doi.org/10.1038/  
635 nature13149](https://doi.org/10.1038/nature13149)
